# Supplementary material for: Multi-Target In Silico Prediction of Inhibitors for Mitogen-Activated Protein Kinase-Interacting Kinases
Source: MDPI journal article supplement (doi:10.3390/biom11111670), 2021-11-10
Supplement: s1 [file s1]

# Multi-Target in silico prediction of Inhibitors for Mitogen Activated Protein Kinase-Interacting Kinases

Amit Kumar Halder <sup>1,2\*</sup>, and M. Natália D. S. Cordeiro <sup>1,\*</sup>

<sup>1</sup> LAQV-REQUIMTE/Faculty of Sciences, University of Porto, 4169-007 Porto, Portugal

<sup>2</sup> Dr. B. C. Roy College of Pharmacy and Allied Health Sciences, Dr. Meghnad Saha Sarani, Bidhannagar, Durgapur 713212, West Bengal, India

\* Correspondence: [amit.halder@fc.up.pt](mailto:amit.halder@fc.up.pt) (A.K.H.); [ncordeir@fc.up.pt](mailto:ncordeir@fc.up.pt) (M.N.D.S.C.)

**Table S2.** The architecture of Deep Neural Network (DNN) model used in the current work and in a previous report of Sosnin et al. [1].

| Hidden Layer | Neurons | Batch Normalization | Dropout ratio |
|--------------|---------|---------------------|---------------|
| 1            | 512     | Yes                 | 0.50          |
| 2            | 256     | Yes                 | 0.50          |
| 3            | 128     | Yes                 | 0.50          |
| 4            | 64      | Yes                 | 0.50          |
| 5            | 32      | Yes                 | 0.25          |
| 6            | 32      | No                  | 0.10          |

## References

1. Sosnin, S.; Karlov, D.; Tetko, I.V.; Fedorov, M.V. Comparative Study of Multitask Toxicity Modeling on a Broad Chemical Space. *J. Chem. Inf. Model.* **2019**, *59*, 1062-1072.
