# Supplementary material for: Multi-Target In Silico Prediction of Inhibitors for Mitogen-Activated Protein Kinase-Interacting Kinases
Source: MDPI journal article supplement (doi:10.3390/biom11111670), 2021-11-10
Supplement: s1 [file s1]

# Multi-Target in silico prediction of Inhibitors for Mitogen Activated Protein Kinase-Interacting Kinases

Amit Kumar Halder <sup>1,2\*</sup>, and M. Natália D. S. Cordeiro <sup>1,\*</sup>

<sup>1</sup> LAQV-REQUIMTE/Faculty of Sciences, University of Porto, 4169-007 Porto, Portugal

<sup>2</sup> Dr. B. C. Roy College of Pharmacy and Allied Health Sciences, Dr. Meghnad Saha Sarani, Bidhannagar, Durgapur 713212, West Bengal, India

\* Correspondence: [amit.halder@fc.up.pt](mailto:amit.halder@fc.up.pt) (A.K.H.); [ncordeir@fc.up.pt](mailto:ncordeir@fc.up.pt) (M.N.D.S.C.)

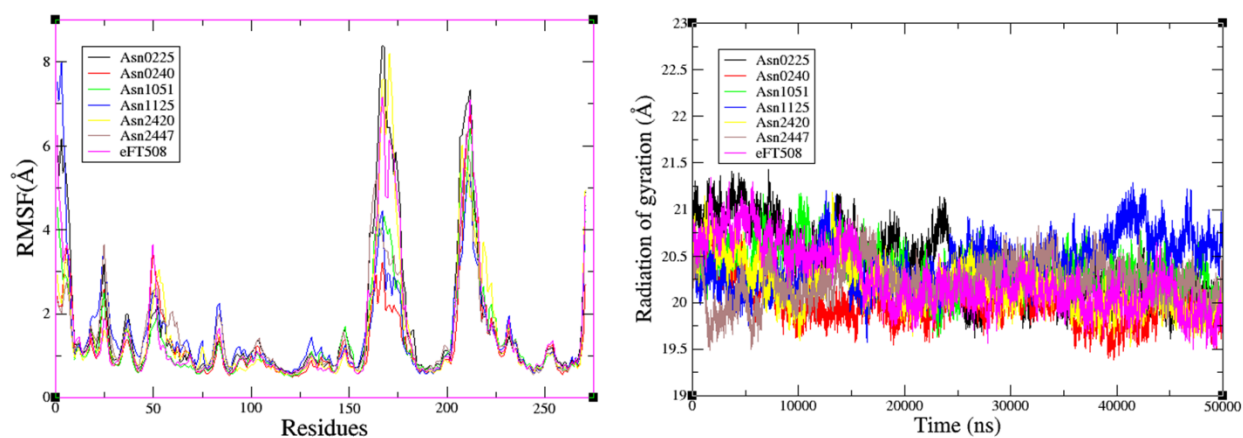

Figure S4. RMSF plot of MNK-2 proteins (left) and radius of gyration plot of MNK-2 protein complexes (right).
